# Supplementary material
Source: PubMed Central journal article supplement (PMC4386364)
Supplement: pnas.201422440SI.pdf [file pnas.201422440SI.pdf]

# Supporting Information

Clarke et al. 10.1073/pnas.1422440112

**Table S1. Order of infusions and drug treatments for the entire study**

| Experimental block          | Group  | Prefrontal area infused on day 1 | Responses per group per session, day 1, mean $\pm$ SEM | Reward only on day 1 | Reward and punishment on day 1 | Saline/diazepam pretreat | Subcortical area inactivated on day 2 | Responses per group per session, day 2, mean $\pm$ SEM |
|-----------------------------|--------|----------------------------------|--------------------------------------------------------|----------------------|--------------------------------|--------------------------|---------------------------------------|--------------------------------------------------------|
| Block 1 not counterbalanced | antOFC | antOFC                           | 154.8 $\pm$ 15.00                                      | Saline               |                                |                          |                                       | 188.5 $\pm$ 13.50                                      |
|                             | vIPFC  | vIPFC                            | 125.5 $\pm$ 45.68                                      | Saline               |                                |                          |                                       | 150.5 $\pm$ 42.29                                      |
|                             | antOFC | antOFC                           | 178.5 $\pm$ 25.84                                      | Mus/bac              |                                |                          |                                       | 181.8 $\pm$ 22.90                                      |
|                             | vIPFC  | vIPFC                            | 141.8 $\pm$ 46.57                                      | Mus/bac              |                                |                          |                                       | 155.0 $\pm$ 41.88                                      |
|                             | antOFC | antOFC                           | 163.0 $\pm$ 27.04                                      |                      | Saline                         |                          |                                       | 157.0 $\pm$ 26.04                                      |
|                             | vIPFC  | vIPFC                            | 145.8 $\pm$ 47.69                                      |                      | Saline                         |                          |                                       | 124.3 $\pm$ 45.80                                      |
|                             | antOFC | antOFC                           | 177.5 $\pm$ 27.96                                      |                      | Mus/bac                        |                          |                                       | 192.3 $\pm$ 51.65                                      |
|                             | vIPFC  | vIPFC                            | 166.4 $\pm$ 43.30                                      |                      | Mus/bac                        |                          |                                       | 123.5 $\pm$ 38.98                                      |
| Block 2 counterbalanced     | antOFC | antOFC                           | 178.0 $\pm$ 41.68                                      |                      | Mus/bac                        | Saline, day 1            |                                       | 214.0 $\pm$ 24.88                                      |
|                             | vIPFC  | vIPFC                            | 155.5 $\pm$ 71.28                                      |                      | Mus/bac                        | Saline, day 1            |                                       | 146.75 $\pm$ 38.65                                     |
|                             | antOFC | antOFC                           | 176.5 $\pm$ 24.46                                      |                      | Mus/bac                        | Diazepam, day 1          |                                       | 189.0 $\pm$ 22.70                                      |
|                             | vIPFC  | vIPFC                            | 157.8 $\pm$ 24.46                                      |                      | Mus/bac                        | Diazepam, day 1          |                                       | 146.5 $\pm$ 31.67                                      |
|                             | antOFC | antOFC                           | 197.0 $\pm$ 21.50                                      |                      | Mus/bac                        | Saline, day 2            |                                       | 226.3 $\pm$ 19.12                                      |
|                             | antOFC | antOFC                           | 181.8 $\pm$ 22.90                                      |                      | Mus/bac                        | Diazepam, day 2          |                                       | 177.2 $\pm$ 20.43                                      |
| Block 3 counterbalanced     | antOFC |                                  | 138.3 $\pm$ 8.29                                       |                      | No infusion                    |                          | Hippocampus                           | 176.0 $\pm$ 7.21                                       |
|                             | antOFC | antOFC                           | 153.0 $\pm$ 14.90                                      |                      | Mus/bac                        |                          | Hippocampus                           | 103.3 $\pm$ 21.34                                      |
|                             | antOFC |                                  | 163.7 $\pm$ 29.03                                      |                      | No infusion                    |                          | Amygdala                              | 165.0 $\pm$ 8.32                                       |
|                             | antOFC | antOFC                           | 170.0 $\pm$ 21.37                                      |                      | Mus/bac                        |                          | Amygdala                              | 205.0 $\pm$ 37.68                                      |
|                             | antOFC | antOFC                           | 227.7 $\pm$ 27.60                                      |                      | Mus/bac                        |                          | Amyg/Hipp disconnection               | 185.7 $\pm$ 11.86                                      |
|                             |        |                                  |                                                        |                      |                                |                          |                                       |                                                        |

In all cases, day 2 was reward only. Amyg/hipp, amygdala/hippocampus; mus/bac, 0.5  $\mu$ L of 0.1 mM muscimol/1.0 mM baclofen infused 20 min before testing; antOFC, anterior orbitofrontal cortex; saline, 0.5  $\mu$ L of saline infused 20 min before testing; vIPFC, ventrolateral prefrontal cortex.
